# Supplementary material for: Observation of positive trions in α-MoO3/MoS2 van der Waals heterostructures
Source: Royal Society of Chemistry journal article supplement (doi:10.1039/d3nr01480k), 2023-01-01
Supplement: d3nr01480k1.pdf [file d3nr01480k1.pdf]

## Supporting Information

### Observation of positive trions in $\alpha$ -MoO<sub>3</sub>/MoS<sub>2</sub> van der Waals heterostructures

Ravindra Kumar<sup>1,3†</sup>, Vikash Mishra<sup>1†</sup>, Tejendra Dixit<sup>2</sup>, Prahalad Kanti Barman<sup>5</sup>, Pramoda K.  
Nayak<sup>3,4\*</sup>, M. S. Ramachandra Rao<sup>1\*</sup>

<sup>1</sup>Department of Physics, Quantum Centre of Excellence for Diamond and Emergent Materials (QuCenDiEM), Nano Functional Materials Technology Centre and Materials Science Research Centre, Indian Institute of Technology Madras, Chennai, 600036, India

<sup>2</sup>Optoelectronics and Quantum Devices Group, Department of Electronics and Communication Engineering, Indian Institute of Information Technology Design and Manufacturing, Kancheepuram, Chennai, 600127, India

<sup>3</sup>Department of Physics, 2D Materials Research and Innovation Group, and Micro-Nano and Bio-Fluidics Group, Indian Institute of Technology Madras, Chennai, 600036, India

<sup>4</sup>Centre for Nano and Material Sciences, Jain (Deemed-to-be University), Jain Global Campus, Kanakapura, Bangalore 562112, Karnataka, India

<sup>5</sup>Department of Physics, 2D Materials Research and Innovation Group, Indian Institute of Technology Madras, Chennai, 600036, India

† Authors contributed equally to this work

*\*Corresponding authors*

Email: pramoda.nayak@jainuniversity.ac.in; msrrao@iitm.ac.in

### Synthesis of MoS<sub>2</sub> flakes

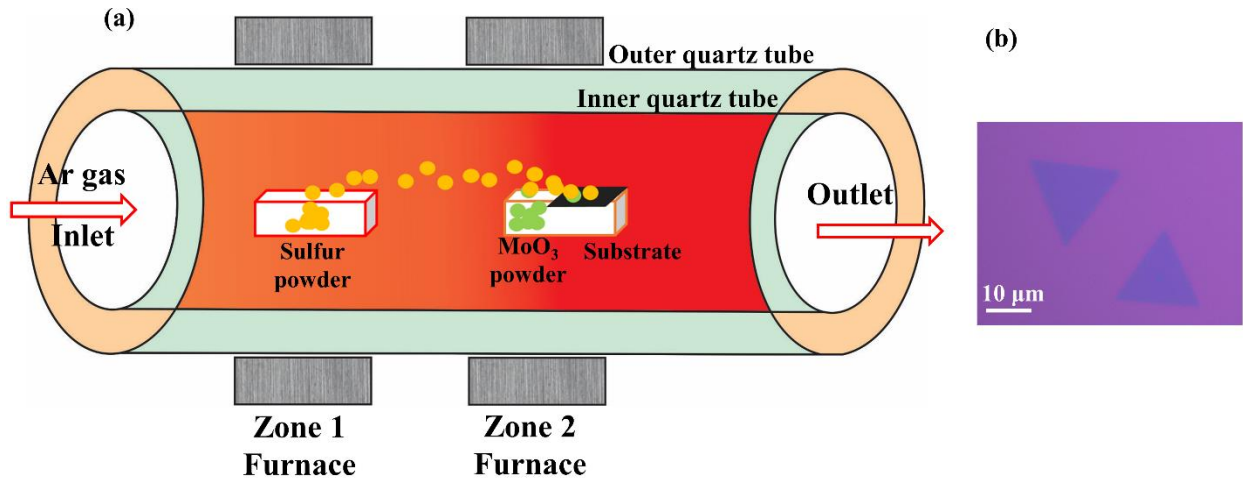

**Fig. S1:** (a) Schematic of CVD setup for the synthesis of MoS<sub>2</sub> flakes. (b) OM image of monolayer MoS<sub>2</sub> flakes.

### Synthesis of α-MoO<sub>3</sub> crystals

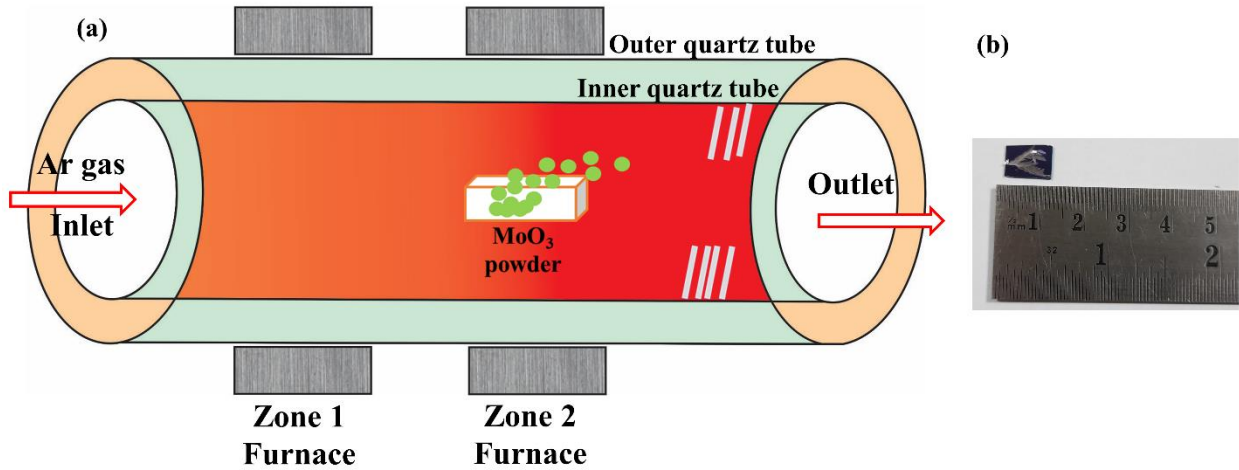

**Fig. S2:** (a) Schematic of PVD setup for the synthesis of α-MoO<sub>3</sub> crystals. White rectangular bars represent the free-standing crystals in the inner quartz tube side walls. (b) OM image of free-standing crystals taken on 300 nm SiO<sub>2</sub>/Si substrate.

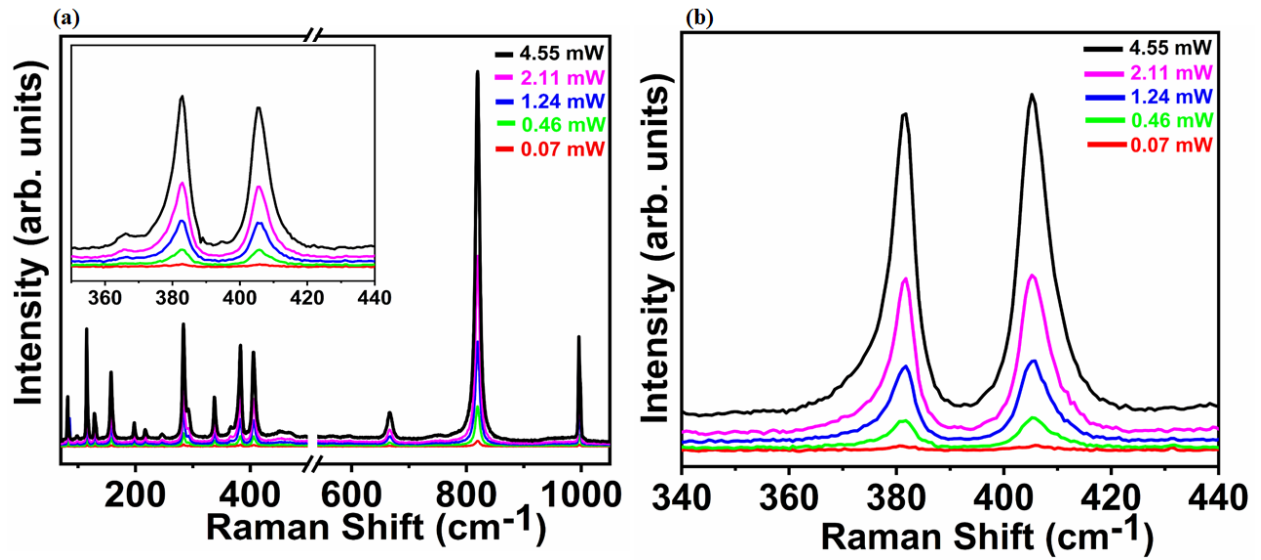

**Fig. S3:** Excitation power-dependent Raman spectra of (a)  $\alpha$ -MoO<sub>3</sub>/MoS<sub>2</sub> HS and (b) MoS<sub>2</sub> with 488 nm laser source. The inset in graph (a) is the magnified image of the 350-440 cm<sup>-1</sup> region, and peaks correspond to the MoS<sub>2</sub> characteristics E<sub>2g</sub> and A<sub>1g</sub> modes. The intensity of the Raman peaks increases for HS as well as MoS<sub>2</sub> with an increase in excitation power.

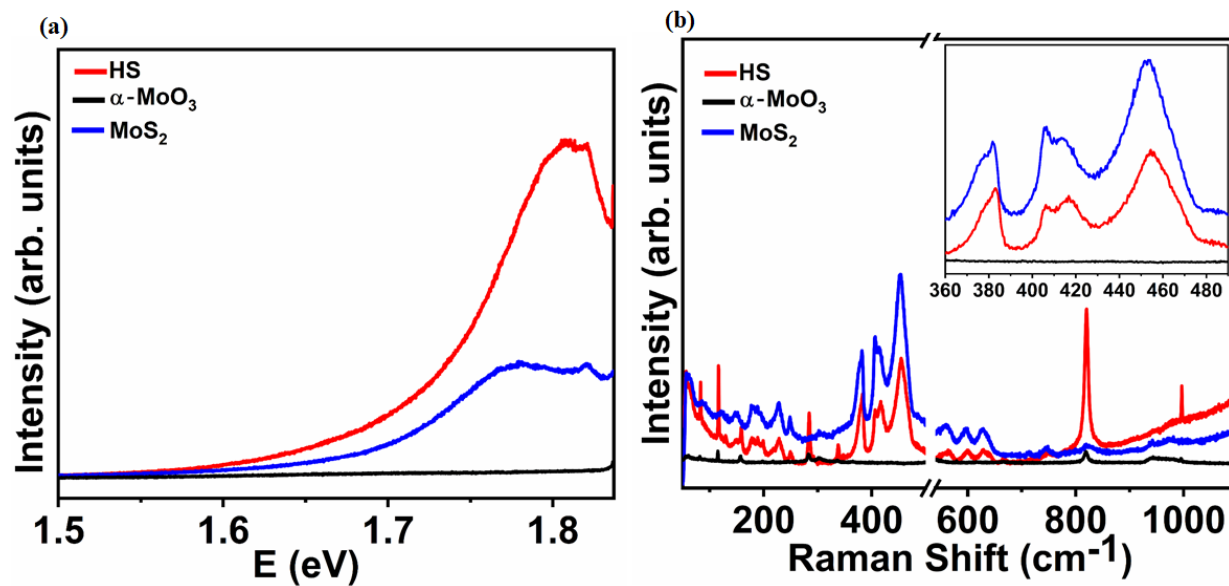

**Fig. S4:** (a) 632 nm laser-excited PL spectra of MoS<sub>2</sub>,  $\alpha$ -MoO<sub>3</sub>, and  $\alpha$ -MoO<sub>3</sub>/MoS<sub>2</sub> HS. As compared to the PL spectra of MoS<sub>2</sub>, the peaks in the HS are blue-shifted. (b) The MoS<sub>2</sub>,  $\alpha$ -MoO<sub>3</sub>, and HS Raman spectra with 632 nm laser excitations. The inset shows the blue shift in the HS peak with respect to the MoS<sub>2</sub> peaks. Also, in the case of HS peaks, positions at 406 and 416 cm<sup>-1</sup> have opposite intensity behavior in comparison to the MoS<sub>2</sub> peaks.

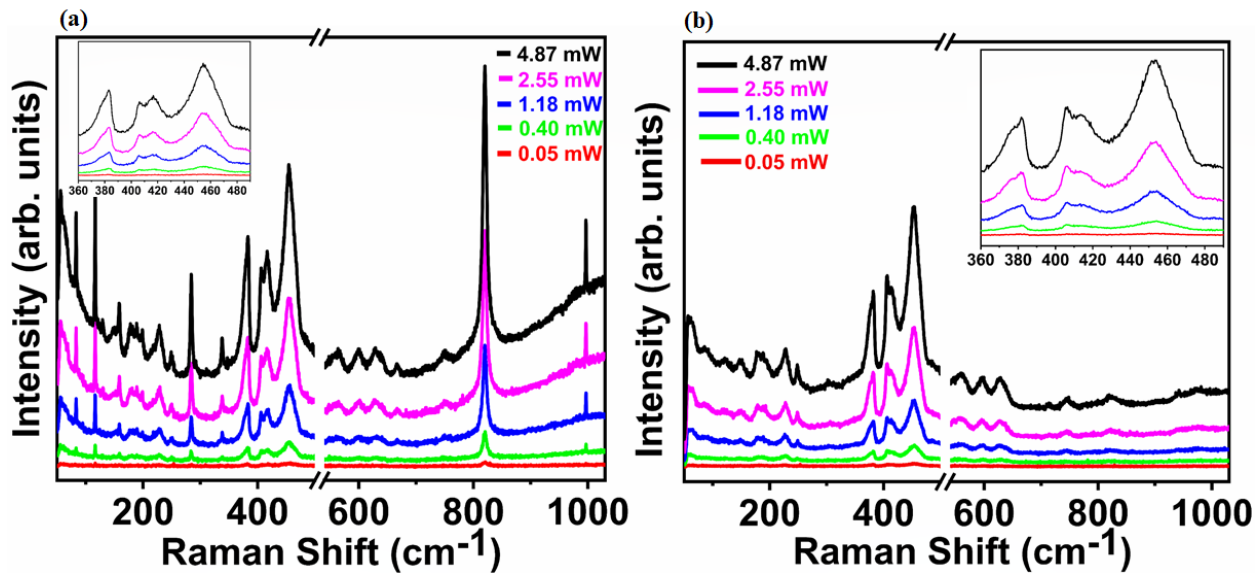

**Fig. S5:** Excitation power-dependent Raman spectra of (a)  $\alpha\text{-MoO}_3/\text{MoS}_2$  HS and (b)  $\text{MoS}_2$  with 632 nm laser source. Insets in the graphs are the magnified view in the range 360-490  $\text{cm}^{-1}$ . The intensity of the Raman peaks increases with the increase in excitation laser power.

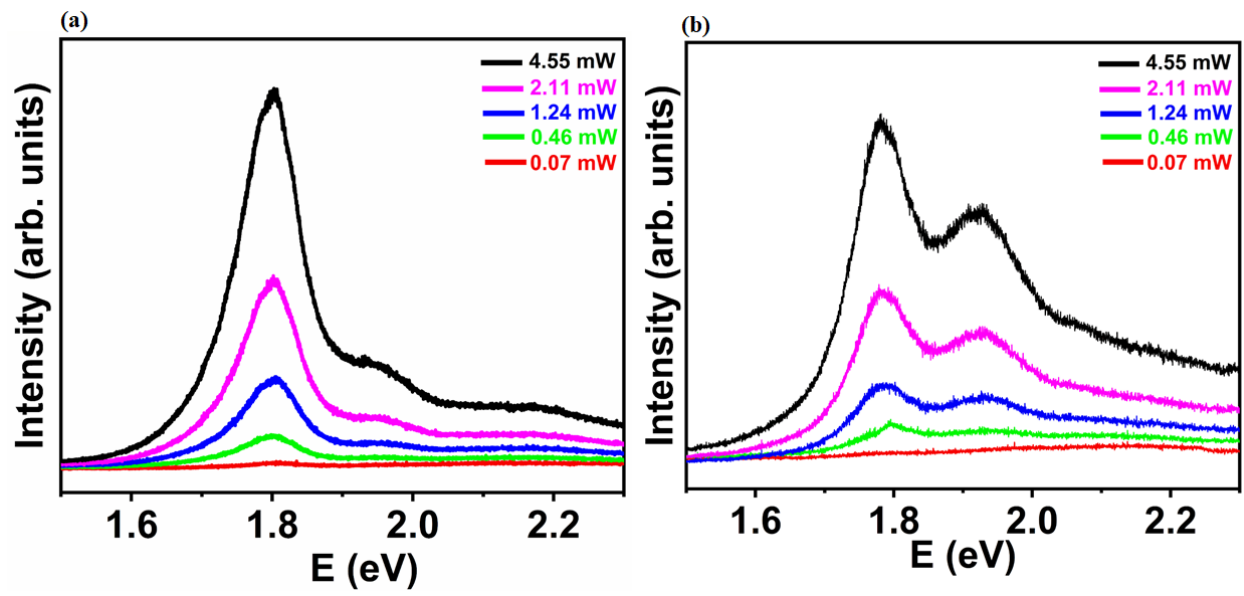

**Fig. S6:** Excitation power-dependent PL spectra of (a)  $\alpha$ -MoO<sub>3</sub>/MoS<sub>2</sub> HS and (b) MoS<sub>2</sub> using a 488 nm laser source. The intensity of the PL emission peaks increases for HS as well as MoS<sub>2</sub> with an increase in excitation power.

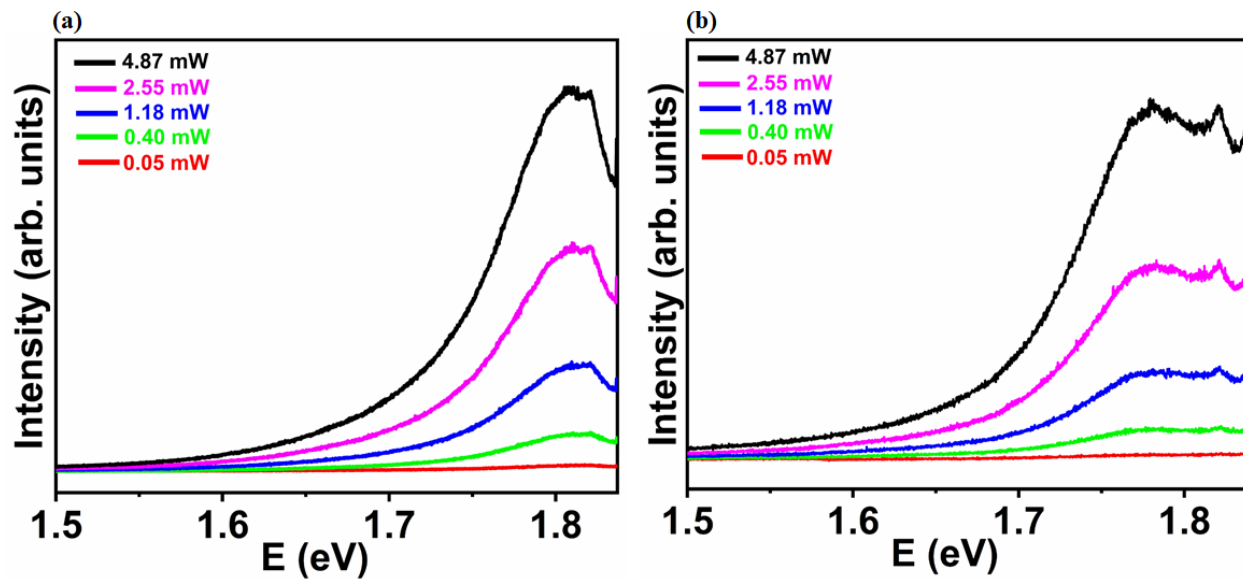

**Fig. S7:** Excitation power-dependent PL spectra of (a)  $\alpha$ -MoO<sub>3</sub>/MoS<sub>2</sub> HS and (b) MoS<sub>2</sub> using a 632 nm laser source. The intensity of the PL emission peaks increases for HS as well as MoS<sub>2</sub> with an increase in excitation power.

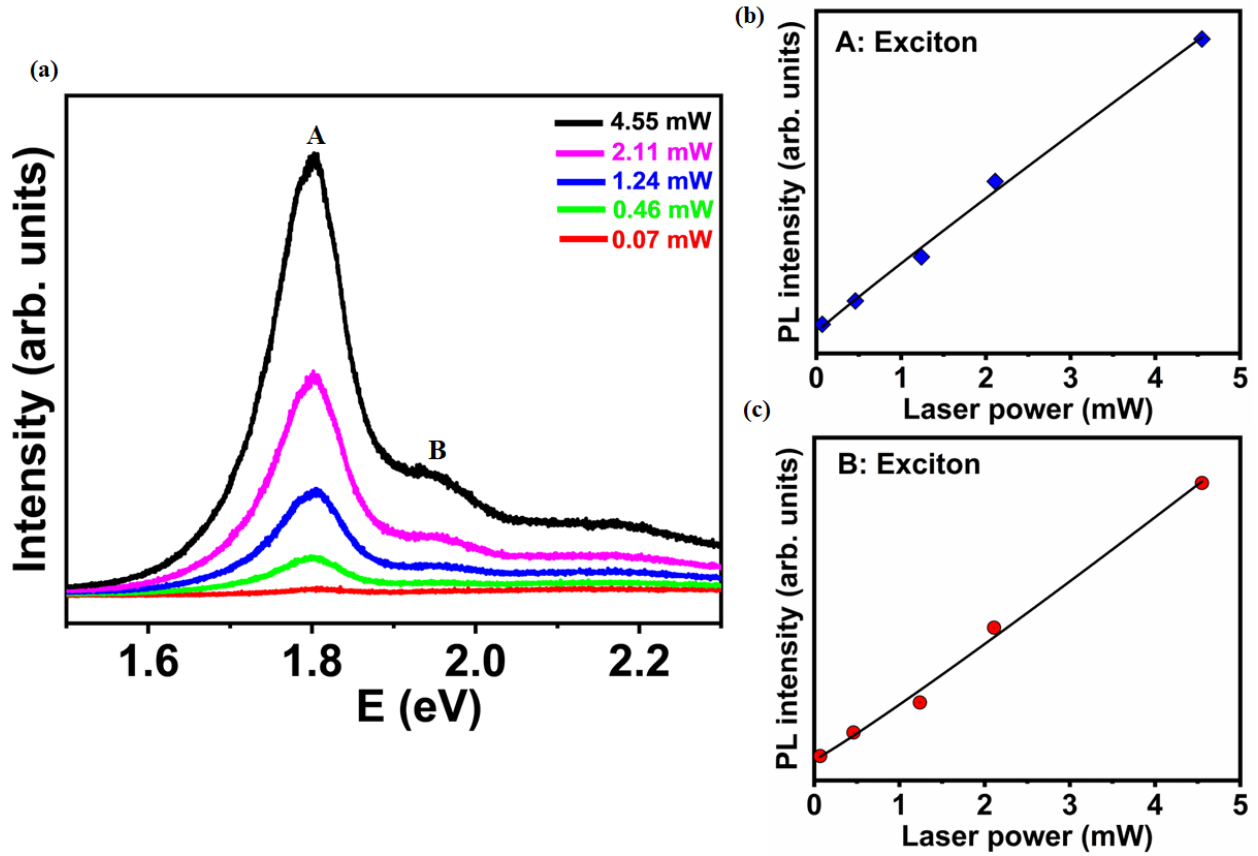

**Fig. S8:** (a) The power-dependent PL spectra of the HS with the 488 nm laser excitation. (b-c) The variation in integrated PL intensity with the incident laser power for A and B exciton, respectively. The integrated PL intensity of the A and B exciton is fitted by the power law ( $I \propto P_{\text{Laser}}^\alpha$ ) and the obtained value of the  $\alpha$  are  $\sim 0.96$  and  $\sim 1.06$  for the A and B exciton, respectively.



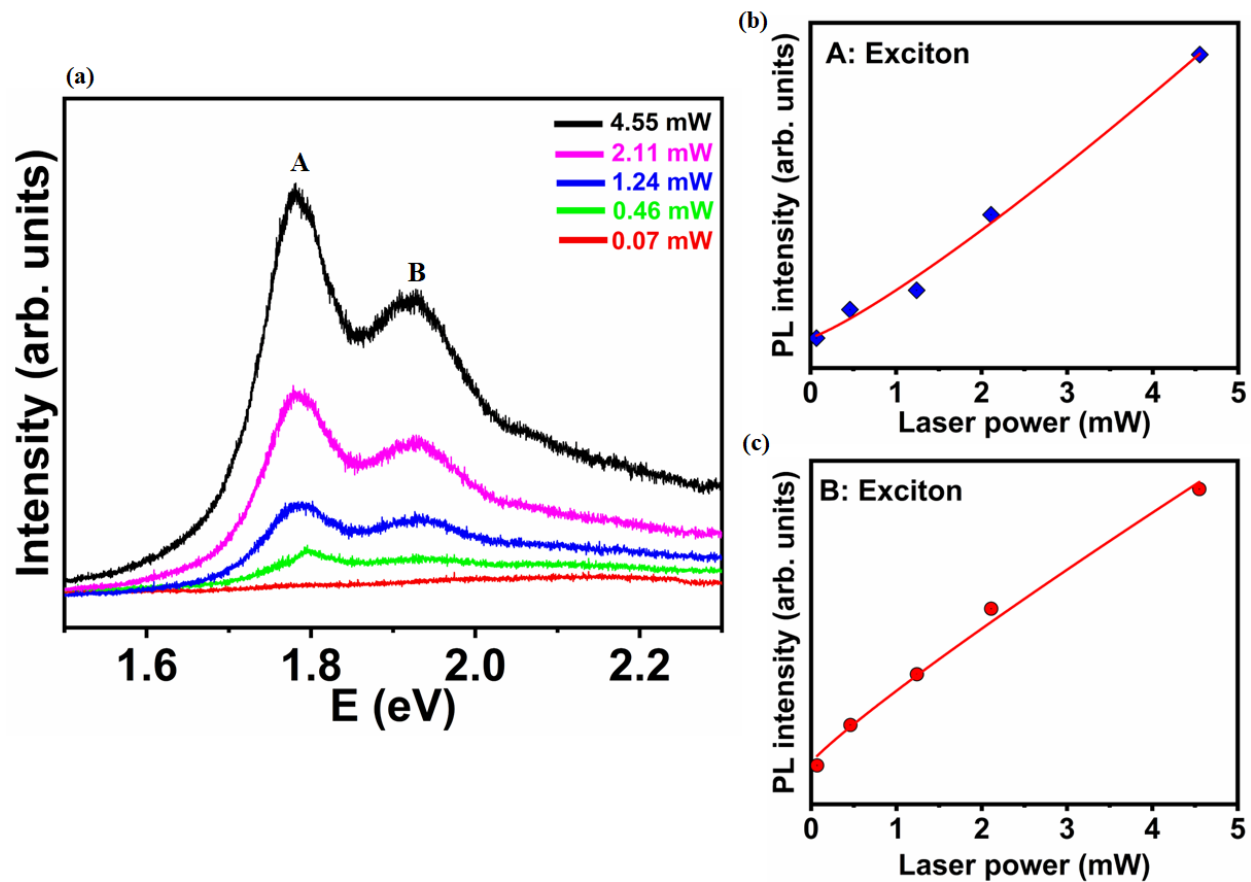

**Fig. S9:** (a) The power-dependent PL spectra of the MoS<sub>2</sub> with the 488 nm laser excitation. (b-c) The variation in integrated PL intensity with the incident laser power for A and B exciton, respectively. The integrated PL intensity of the A and B exciton is fitted by the power law ( $I \propto P_{\text{Laser}}^\alpha$ ) and the calculated values of the  $\alpha$  are  $\sim 1.18$  and  $\sim 0.92$  for the A and B exciton, respectively.
